# Supplementary material for: Exciton–dipole coupling in two-dimensional rubrene assembly sensors
Source: Royal Society of Chemistry journal article supplement (doi:10.1039/c8nr10373a), 2019-01-01
Supplement: c8nr10373a1.pdf [file c8nr10373a1.pdf]

## Supporting information

# Exciton-dipole coupling in two-dimensional rubrene assembly sensors

*Ying-Shi Guan<sup>1,2</sup>, Feng Hu<sup>1,2</sup>, Changning Li<sup>1,2</sup>, Shenqiang Ren<sup>1,2\*</sup>*

<sup>1</sup> Department of Mechanical and Aerospace Engineering, University at buffalo, The State  
University of New York, Buffalo, NY, 14260, USA

<sup>2</sup> Research and Education in eNergy, Environment and Water (RENEW) Institute, University at  
buffalo, The State University of New York, Buffalo, NY, 14260, USA

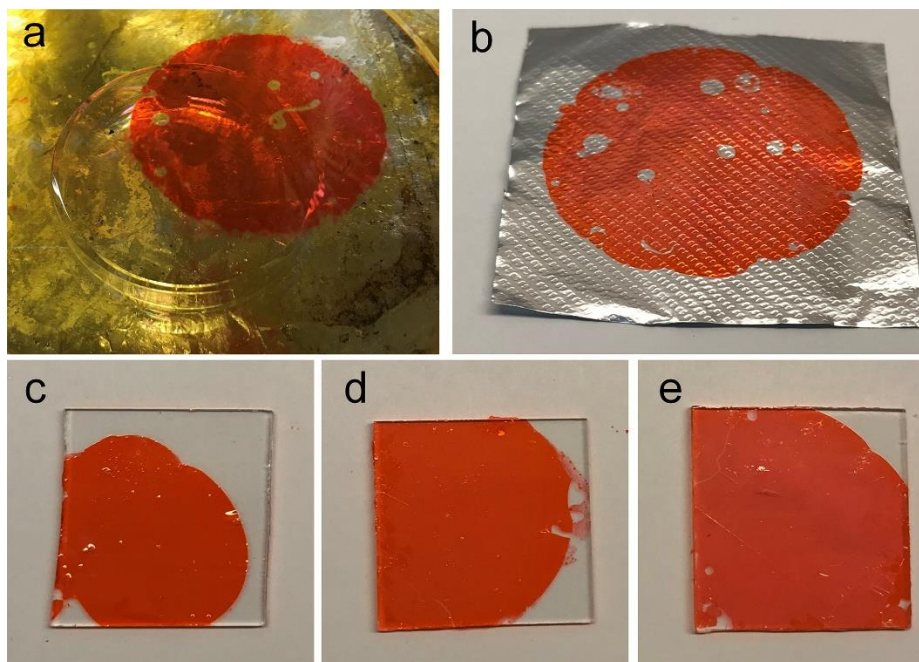

Figure S1. The freestanding rubrene film with different thickness on the water surface.

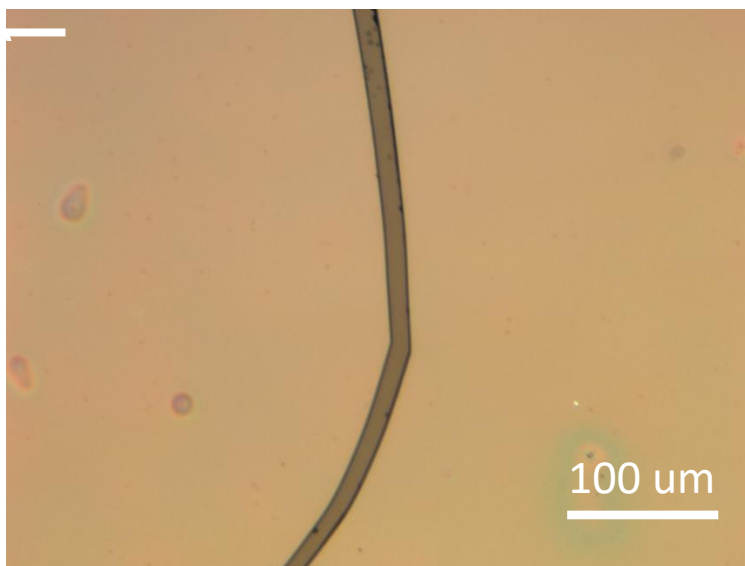

Figure S2. The optical image of the rubrene nanosheet.

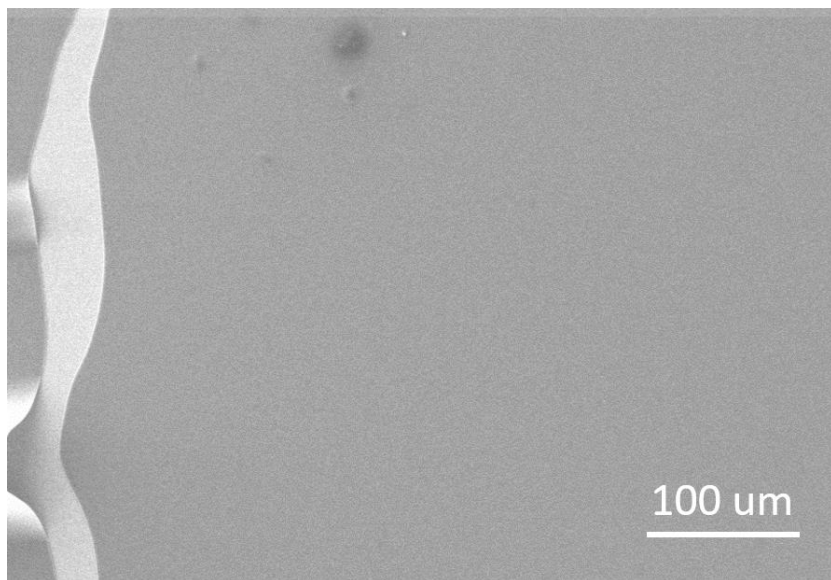

Figure S3. The SEM image of the rubrene nanosheet.

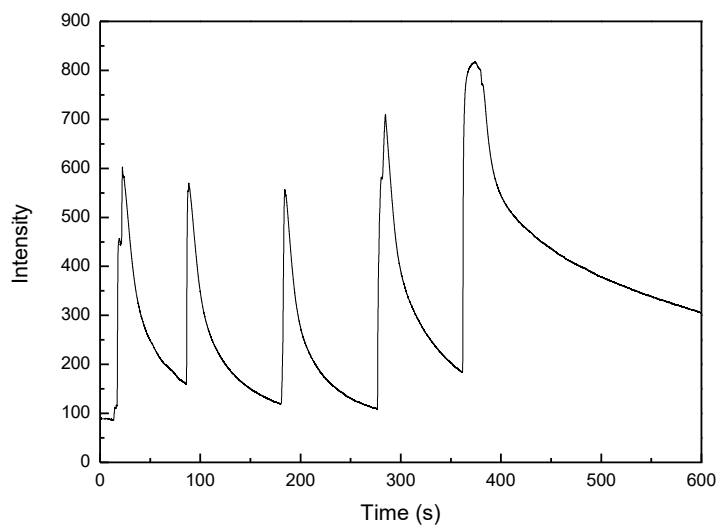

Figure S4. The performance of the commercial sensor for detecting acetone.

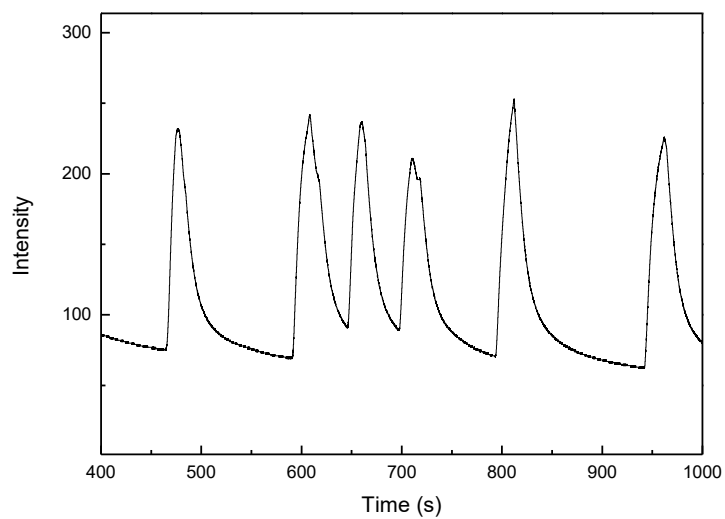

Figure S5. The performance of the commercial sensor for detecting toluene.

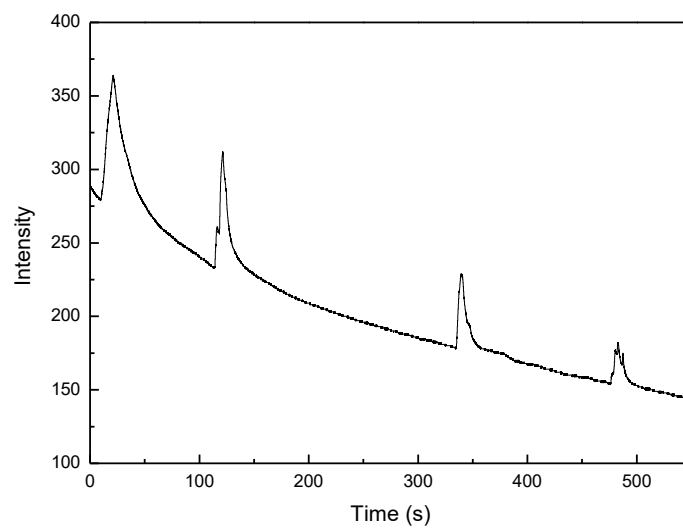

Figure S6. The performance of the commercial sensor for detecting IPA.

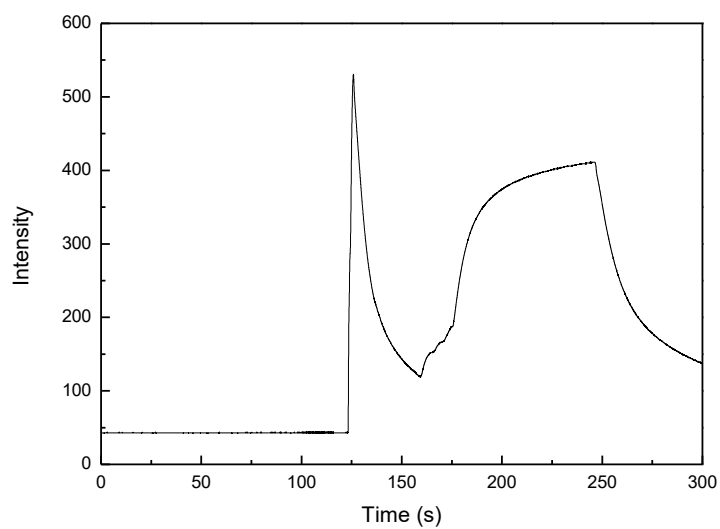

Figure S7. The performance of the commercial sensor for detecting DCB.

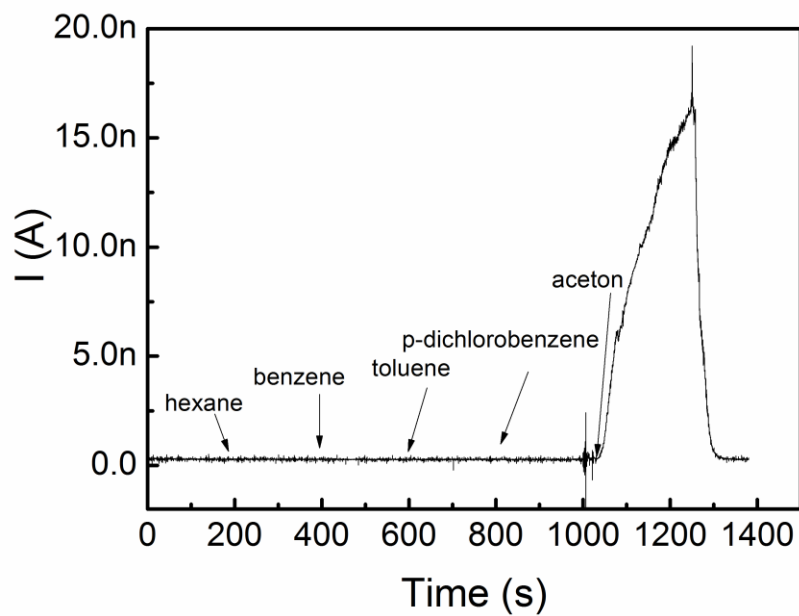

Figure S8. The current change of the rubrene sensor when exposed to hexane, benzene, toluene, p-dichlorobenzene and acetone.

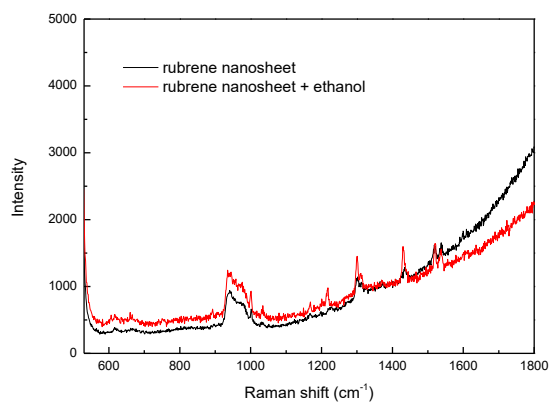

Figure S9. The Raman spectra of rubrene nanosheet before and after ethanol adsorption.

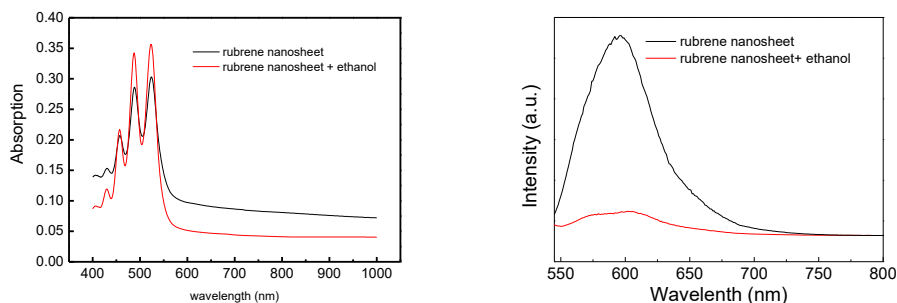

Figure S10. The absorption and emission spectra of the rubrene nanosheet before and after ethanol adsorption.

The sensor response follows a good linear trend over a wide range of ethanol level, as shown in Figure 3f. The linear fit equation is illustrated as

$$\lg(y)=23.6+0.255\lg(x)$$

x, y refer to the concentration of the ethanol gas and the sensitivity of rubrene ECN sensor, defining as  $I_g/I_a$ .
